# Supplementary material for: A multifaceted biomimetic periosteum with a lamellar architecture and osteogenic/angiogenic dual bioactivities
Source: Royal Society of Chemistry journal article supplement (doi:10.1039/d3bm00382e), 2023-01-01
Supplement: d3bm00382e2.pdf [file d3bm00382e2.pdf]

Table S1 Primer sequences for quantitative RT-PCR of BMSCs.

| Genes          |         | Primer                 |
|----------------|---------|------------------------|
| <i>ALP</i>     | Forward | CCTGGACCTCATCAGCATTT   |
| <i>ALP</i>     | Reverse | AGGGAAGGGTCAGTCAGGTT   |
| <i>Runx2</i>   | Forward | TCTCTGACCGCCTCAGTGATT  |
| <i>Runx2</i>   | Reverse | TGTGTCTGCCTGGGATCTGTA  |
| <i>BMP-2</i>   | Forward | GAAGCCAGGTGTCTCCAAGAG  |
| <i>BMP-2</i>   | Reverse | GTGGATGTCCTTTACCGTCGT  |
| <i>OPN</i>     | Forward | GGAGTCCGATGAGGCTATCAA  |
| <i>OPN</i>     | Reverse | TCCGACTGCTCAGTGCTCTC   |
| <i>Col 1</i>   | Forward | TGGATGGCTGCACGAGT      |
| <i>Col 1</i>   | Reverse | TTGGGATGGAGGGAGTTTA    |
| <i>OCN</i>     | Forward | GACCCTCTCTGCTCACTCT    |
| <i>OCN</i>     | Reverse | GACCTTACTGCCCTCCTGCTTG |
| <i>GAPDH-1</i> | Forward | GCAAGTTCAACGGCACAG     |
| <i>GAPDH-1</i> | Reverse | CGCCAGTAGACTCCACGAC    |

Table S2 Primer sequences for quantitative RT-PCR of HUVECs.

| Genes                          |         | Primer                    |
|--------------------------------|---------|---------------------------|
| <i>VEGF-2</i>                  | Forward | GCTGTCTTGGGTGCATTGG       |
| <i>VEGF-2</i>                  | Reverse | GCAGCCTGGGACCACTTG        |
| <i>TGF-<math>\beta</math></i>  | Forward | CGCCAGAGTGGTTATCTTTTG     |
| <i>TGF-<math>\beta</math></i>  | Reverse | CGGTAGTGAACCCGTTGATGT     |
| <i>HIF-<math>\alpha</math></i> | Forward | CAGAGCAGGAAAAGGAGTCA      |
| <i>HIF-<math>\alpha</math></i> | Reverse | AGTAGCTGCATGATCGTCTG      |
| <i>GAPDH-1</i>                 | Forward | TGGCACCCAGCACAATGAA       |
| <i>GAPDH-1</i>                 | Reverse | CTAAGTCATAGTCCGCCTAGAAGCA |
